# Supplementary material for: A highly selective “ON–OFF” probe for colorimetric and fluorometric sensing of Cu2+in water
Source: Royal Society of Chemistry journal article supplement (doi:10.1039/c6ra27017d), 2017-01-01
Supplement: c6ra27017d1.pdf [file c6ra27017d1.pdf]

## Electronic Supplementary Information

# A highly selective “ON-OFF” probe for colorimetric and fluorometric sensing of Cu<sup>2+</sup> in water

Barnali Naskar,<sup>a</sup> Ritwik Modak,<sup>a</sup> Dilip K. Maiti,<sup>a</sup> Antonio Bauzá,<sup>b</sup> Antonio Frontera,<sup>b</sup> Pulak Kumar Maiti,<sup>c</sup> Sukhendu Mandal<sup>c</sup> and Sanchita Goswami<sup>\*,a</sup>

<sup>a</sup>Department of Chemistry, University of Calcutta, 92, A.P.C. Road, Kolkata-700009, India.

<sup>b</sup>Departament de Química, Universitat de les Illes Balears, Crta. de Valldemossa km 7.5, 07122 Palma de Mallorca, Balears, Spain.

<sup>c</sup>Department of Microbiology, University of Calcutta, 35, Ballygunge Circular Road, Kolkata, India.

## Contents of the Supporting Information

### 1. Characterization, Structure and Crystallographic Data

### Pages

|                                                                                                        |      |
|--------------------------------------------------------------------------------------------------------|------|
| Figure S1. <sup>1</sup> H and <sup>13</sup> C-NMR spectrum of chemosensor ( <b>H<sub>5</sub>dpm</b> ). | S3   |
| Figure S2. <sup>1</sup> H-NMR spectrum of Complex 2.                                                   | S4   |
| Figure S3. FT-IR Spectrum of ( <b>H<sub>5</sub>dpm</b> ), complex 1 and complex 2.                     | S4-5 |
| Figure S4. ESI-MS of chemosensor ( <b>H<sub>5</sub>dpm</b> ), complex 1 and complex 2 in methanol.     | S6-8 |
| Figure S5. Molecular structure of crystal monocationic Zn <sup>2+</sup> (complex 1).                   | S9   |
| Table S1. Crystal data and structure refinement of complex 1.                                          | S10  |
| Table S2. Selected Bond distances (Å) and angles (°) in the metal coordination spheres of complex 1.   | S11  |

### 2. Photophysical Characterization

|                                                                                                                                                            |     |
|------------------------------------------------------------------------------------------------------------------------------------------------------------|-----|
| Figure S6. Absorbance spectra of <b>H<sub>5</sub>dpm</b> in the presence of various metal ions.                                                            | S12 |
| Figure S7. Anion independent absorbance behaviour of <b>H<sub>5</sub>dpm</b> in presence of various counter anions of Cu <sup>2+</sup> salts.              | S13 |
| Figure S8. Benesi-Hildebrand plot of absorbance titration curve of <b>H<sub>5</sub>dpm</b> and Cu <sup>2+</sup> ion.                                       | S13 |
| Figure S9. Benesi-Hildebrand plot of fluorescence titration curve of <b>H<sub>5</sub>dpm</b> and Cu <sup>2+</sup> ion.                                     | S14 |
| Figure S10. Job's plot for determination of stoichiometry of Cu <sup>2+</sup> : <b>H<sub>5</sub>dpm</b> complex in solution.                               | S14 |
| Figure S11. Detection Limit for Cu <sup>2+</sup> ion.                                                                                                      | S15 |
| Figure S12. Absorption Spectra of chemosensor ( <b>H<sub>5</sub>dpm</b> ) in the presence of Cu <sup>2+</sup> ion followed by addition of EDTA.            | S16 |
| Figure S13. Fluorescence emission spectra of chemosensor ( <b>H<sub>5</sub>dpm</b> ) in the presence of Cu <sup>2+</sup> ion followed by addition of EDTA. | S16 |
| Figure S14. Fluorescence spectra of <b>H<sub>5</sub>dpm</b> in the presence of various metal ions.                                                         | S17 |
| Figure S15. Anion independent Emission intensity of <b>H<sub>5</sub>dpm</b> in presence of various counter anions of Cu <sup>2+</sup> salts.               | S17 |

**Figure S16.** Emission intensity of probe **H<sub>5</sub>dpm** (5 μM) in absence and in presence of Cu<sup>2+</sup> at different pH values in aqueous solution. S18

**Figure S17.** Linear solvation energy relationship plot of wavenumber (cm<sup>-1</sup>) vs. Dipolarity (π\*). S18

**Figure S18.** Linear solvation energy relationship plot of wavenumber (cm<sup>-1</sup>) vs. HBD Strength (α). S19

**Figure S19.** Linear solvation energy relationship plot of wavenumber (cm<sup>-1</sup>) vs. HBA Strength (β). S19

### **3. Theoretical Data**

**Figure S20.** BP86-D3/def2-TZVP optimized structure of [Cu<sub>2</sub>(**H<sub>2</sub>dpm**)H<sub>2</sub>O]<sup>+</sup> complex. S20

**Figure S21.** Molecular orbital and spin density plots obtained for complex **2** using H<sub>2</sub>O instead of MeOH bridging ligand. S20

**Table S3.** Selected parameters for the vertical excitation (UV-vis absorptions), electronic excitation energies (eV) and oscillator strengths (*f*), configurations of the low-lying excited states of **H<sub>5</sub>dpm**. S21

**Table S4.** Selected parameters for the vertical excitation (UV-vis absorptions) of complex **2**, electronic excitation energies (eV) and oscillator strengths (*f*), configurations of the low-lying excited states of complex **2**; calculation of the S<sub>0</sub>-S<sub>n</sub> energy gaps based on optimized ground-state geometries (UV-vis absorption) (MeOH or H<sub>2</sub>O used as solvent). S21

### **4. Miscellaneous**

**Chart 1.** Comparison of the present probe, **H<sub>5</sub>dpm** with some of the recently reported probes for Cu<sup>2+</sup> encountered in literature. S22-23

1.Characterization, Structure and Crystallographic Data.

**$^1\text{H}$  and  $^{13}\text{C}$ -NMR spectra:**  $\text{H}_5\text{dpm}$  was dissolved in  $d_6$ -DMSO and recorded with TMS as internal standard on a Bruker, AV 300 Supercon Digital NMR system.

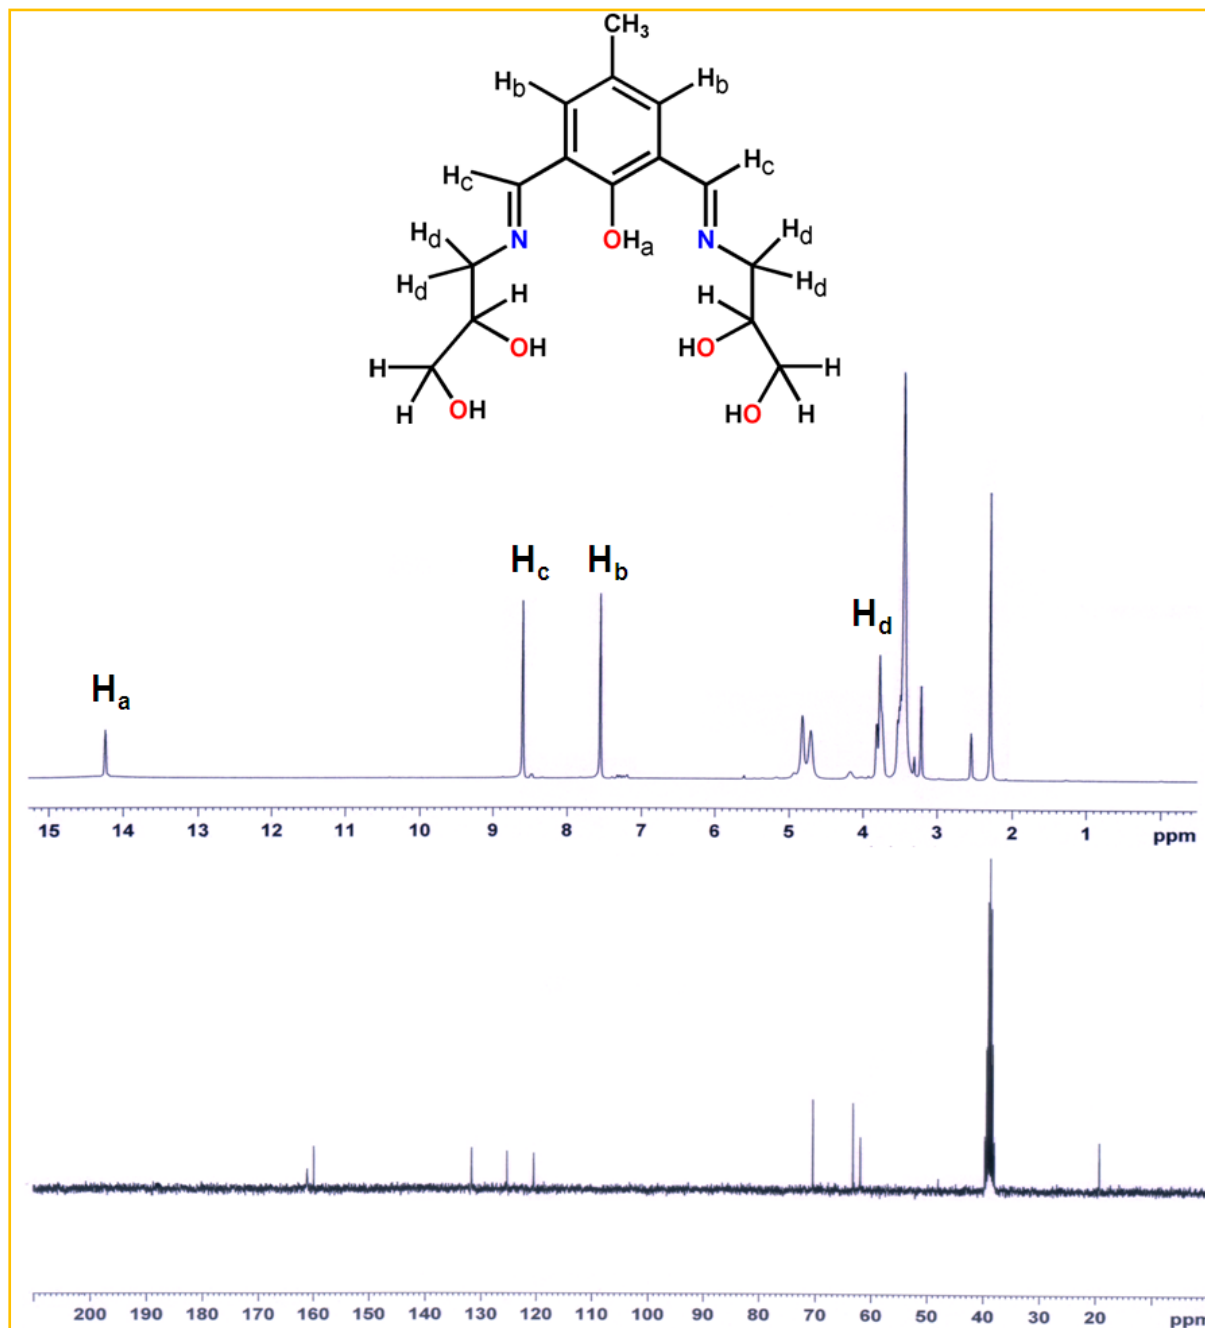

**Figure S1.**  $^1\text{H}$  and  $^{13}\text{C}$ -NMR spectrum of chemosensor ( $\text{H}_5\text{dpm}$ ).

1. Characterization, Structure and Crystallographic Data.

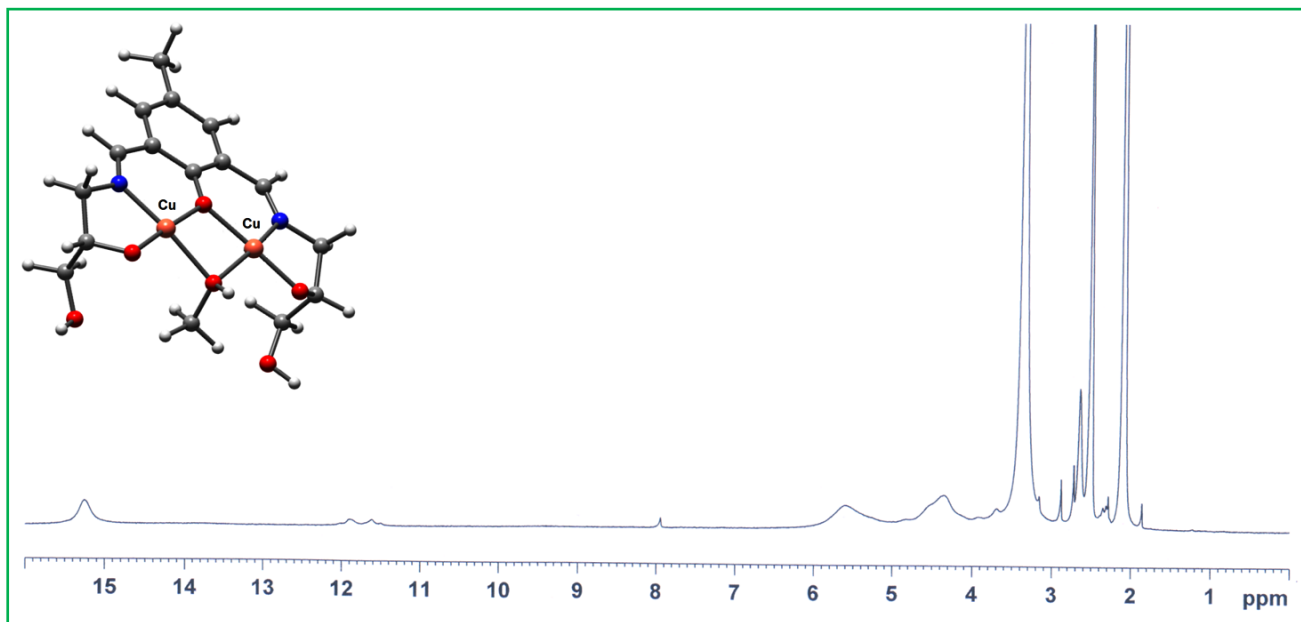

Figure S2.  $^1\text{H}$ -NMR spectrum of Complex 2.

**FT-IR spectroscopy:** Fourier transform infrared (FT-IR) spectra were recorded with a Perkin-Elmer RXI FT-IR spectrophotometer using the reflectance technique ( $4000\text{--}400\text{ cm}^{-1}$ ). Samples were prepared as KBr disks.

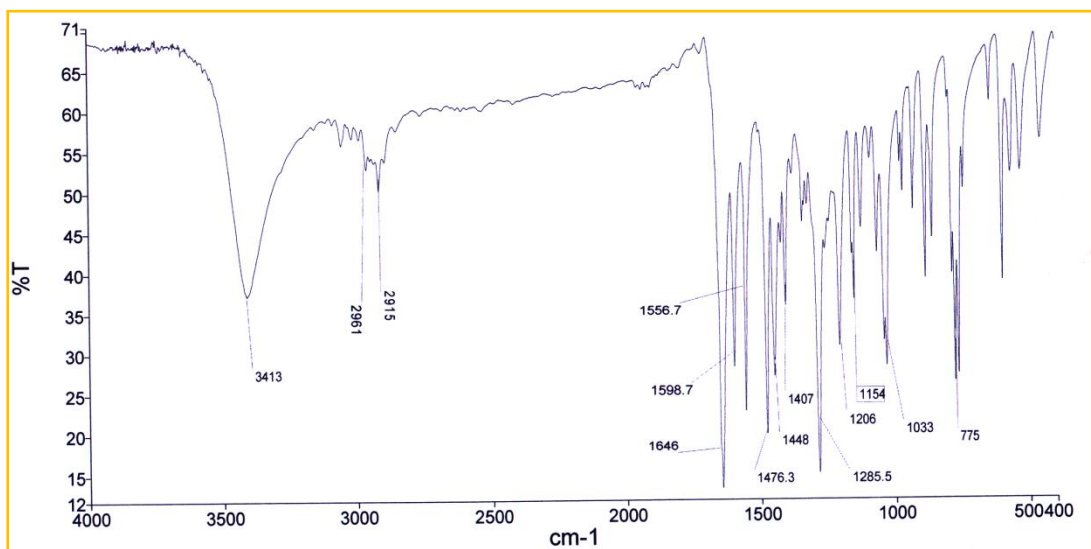

**H<sub>5</sub>dpm**

# 1. Characterization, Structure and Crystallographic Data.

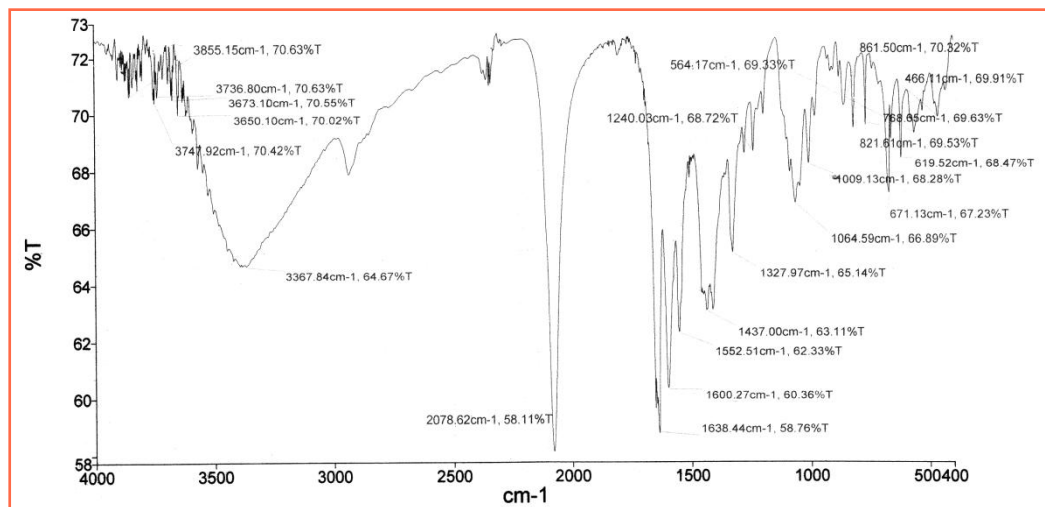

Complex 1

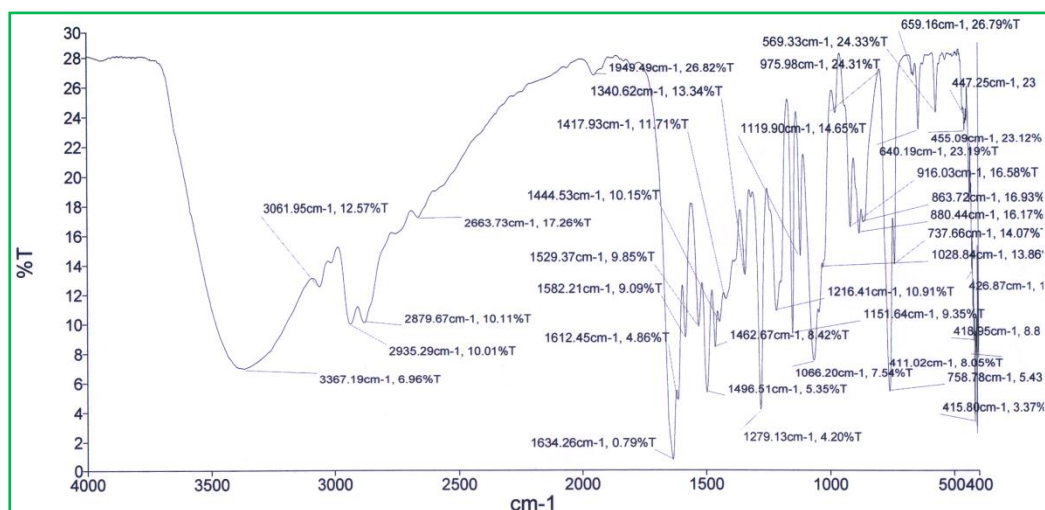

Complex 2

Figure S3. FT-IR Spectrum of chemosensor ( $H_5dpm$ ), complex 1 and complex 2.

1. Characterization, Structure and Crystallographic Data.

**Electrospray mass spectra** (ESI-MS) were recorded on Qtof Micro YA263 mass spectrometer dissolving the samples in LC-MS quality MeOH.

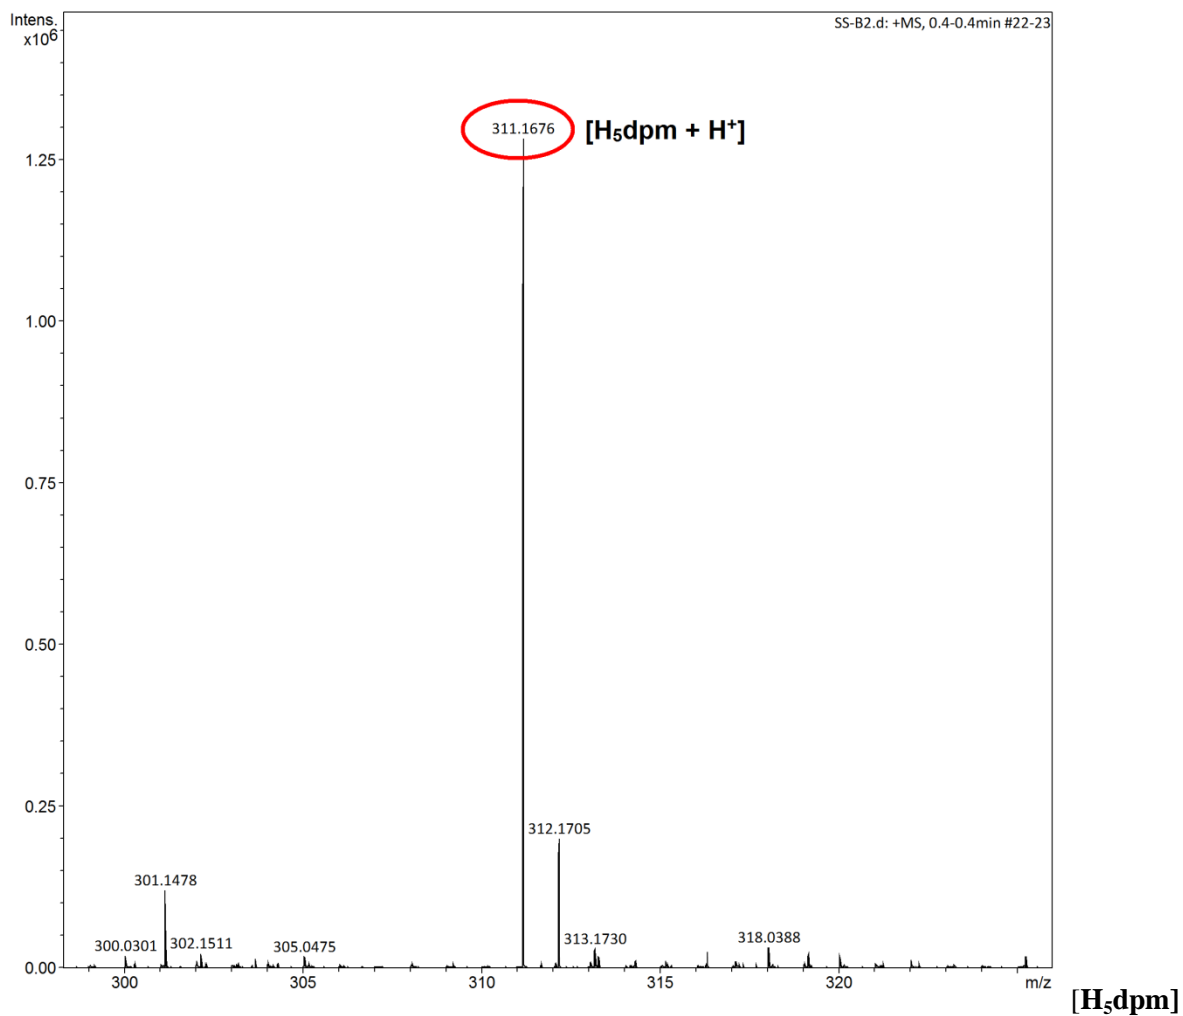

1. Characterization, Structure and Crystallographic Data.

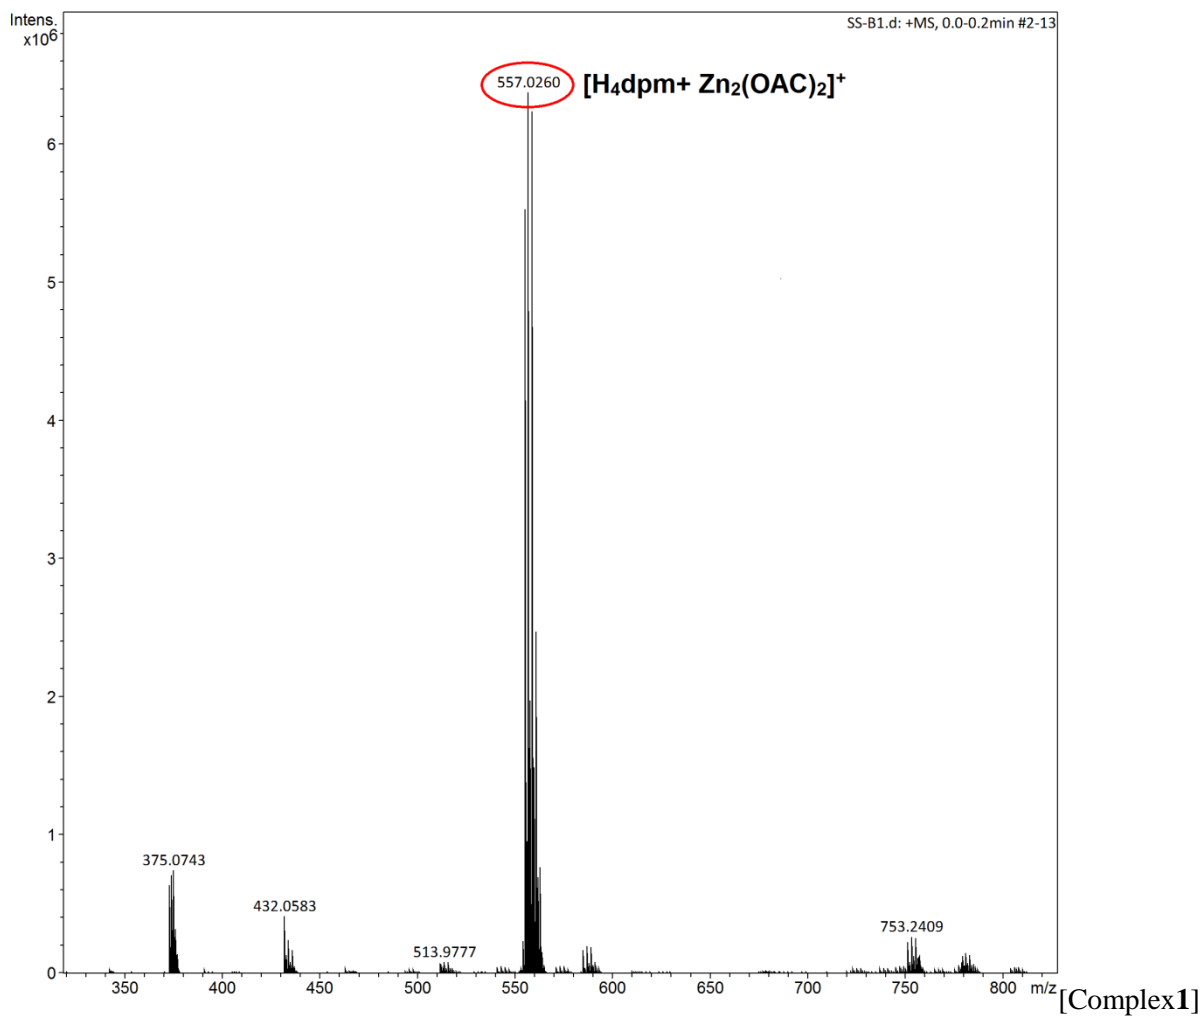

1. Characterization, Structure and Crystallographic Data.

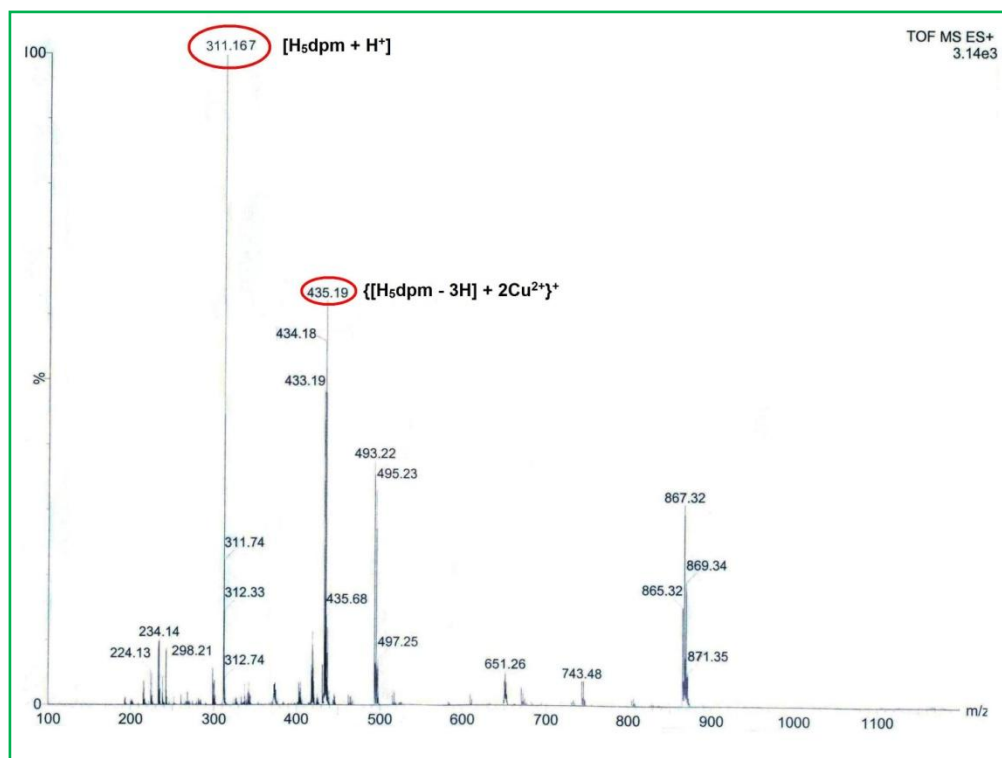

[Complex 2]

**Figure S4.** ESI-MS of chemosensor (**H<sub>5</sub>dpm**), complex 1 and complex 2.



### Single-Crystal X-ray data collection and structure determination of Complex 1

Selected single crystals for complex **1** were mounted on Nonius APEX-II diffractometer with CCD-area detector at 296 K using graphite-monochromated Mo-K $\alpha$  radiation ( $\lambda = 0.71073$  Å). The structure was solved by direct methods and refined by full-matrix, least-squares refinement methods based on  $F^2$ , using SHELX-97 [1]. An empirical absorption corrections were applied using SADABS program [2]. The hydrogen atoms were refined isotropically, while the non hydrogen atoms were refined anisotropically. The crystallographic figures have been generated using Diamond 3.0 software [3]. It is worth noting that good quality single crystal data for complex **1** was unsuccessful, despite several attempts to measure this complex. The structure refinement parameters and crystallographic data of complex **1** is listed in **Table S1** and **Table S2**. CCDC-1529126 contains supplementary crystallographic data for this paper. These data can be obtained free of charge from the Cambridge Crystallographic Data Centre via [www.ccdc.cam.ac.uk/data\\_request/cif](http://www.ccdc.cam.ac.uk/data_request/cif).

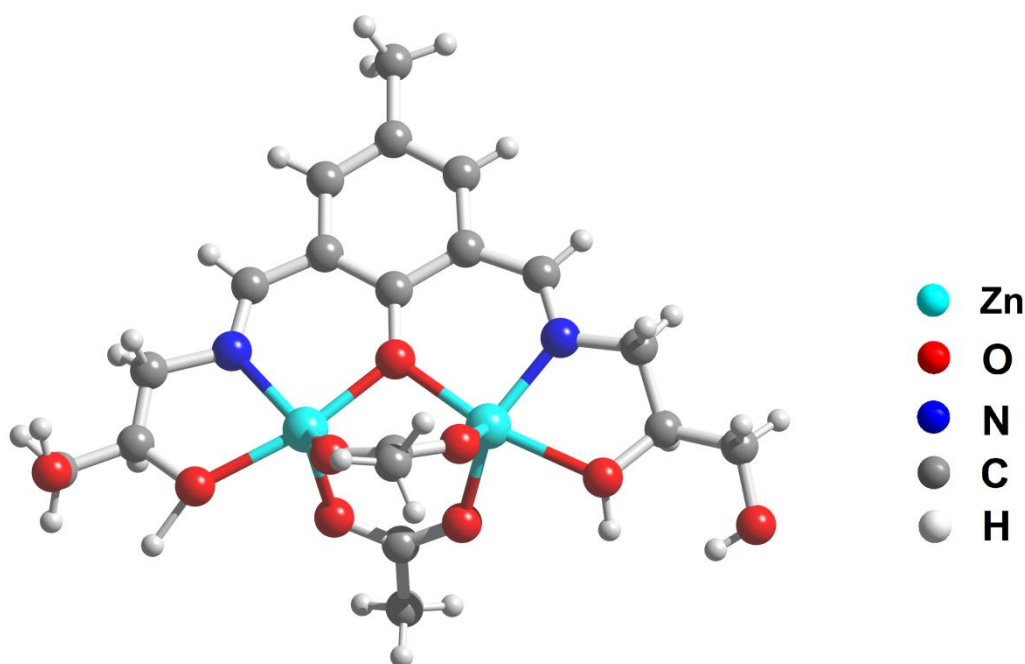

**Figure S5.** Molecular structure of crystal monocationic Zn<sup>2+</sup> (complex **1**). Counter anion was omitted for clarity.

1. Characterization, Structure and Crystallographic Data.

**Single Crystal X-ray diffraction:** Crystallographic data for complex **1** was collected on a Bruker Nonius Apex II CCD diffractometer with graphite monochromated Mo-K $\alpha$  radiation ( $\lambda = 0.71073 \text{ \AA}$ ) at 296K.

**Table S1.** Crystal data and structure refinement of complex **1**.

| <b>Complex 1</b>                          |                                                                                 |
|-------------------------------------------|---------------------------------------------------------------------------------|
| Chemical formula                          | C <sub>20</sub> H <sub>26</sub> N <sub>3</sub> O <sub>9</sub> S Zn <sub>2</sub> |
| Formula weight                            | 615.28                                                                          |
| Temperature/K                             | 296(2)                                                                          |
| $\lambda^a / \text{\AA}$                  | 0.71073                                                                         |
| Crystal system                            | triclinic                                                                       |
| Space group                               | P-1                                                                             |
| $a$ (Å)                                   | 8.3433(13)                                                                      |
| $b$ (Å)                                   | 12.2995(18)                                                                     |
| $c$ (Å)                                   | 15.029(2)                                                                       |
| $\alpha$ (°)                              | 85.243(5)                                                                       |
| $\beta$ (°)                               | 84.810(5)                                                                       |
| $\gamma$ (°)                              | 87.894(5)                                                                       |
| $Z$                                       | 2                                                                               |
| $V$ (Å <sup>3</sup> )                     | 1530.0(4)                                                                       |
| $\rho$ calc(g/cm <sup>3</sup> )           | 1.336                                                                           |
| $\mu$ (mm <sup>-1</sup> )                 | 1.680                                                                           |
| $F(000)$                                  | 630.0                                                                           |
| $\theta$ min–max (°)                      | 1.4 to 24.2                                                                     |
| Reflns collected                          | 15705                                                                           |
| Independent reflns                        | 4826                                                                            |
| R(int)                                    | 0.0352                                                                          |
| S(GOF)                                    | 0.950                                                                           |
| $RI, wR2(I > 2\sigma(I))_a$               | 0.2368 <sup>b</sup> , 0.6462 <sup>c</sup>                                       |
| $RI, wR2(\text{all data})_b$              | 0.2431, 0.6685                                                                  |
| largest diff peak, hole/e Å <sup>-3</sup> | 11.853 and -1.381                                                               |

<sup>a</sup>Graphite monochromator, <sup>b</sup> $R_1 = \Sigma(|F_o| - |F_c|)/\Sigma|F_o|$ . <sup>c</sup> $wR_2 = \{\Sigma[w(|F_o|^2 - |F_c|^2)^2]/\Sigma[w(|F_o|^2)^2]\}^{1/2}$

1. Characterization, Structure and Crystallographic Data.

**Table S2.** Selected Bond distances (Å) and angles (°) in the metal coordination spheres of complex **1**.

**Table S2.** Selected Geometrical Parameters (Distances/Å and Angles/deg).

| bond lengths (°) |           | bond angle (Å) |          |
|------------------|-----------|----------------|----------|
| Zn1 – O4         | 2.015(13) | O4–Zn1–O6      | 100.2(5) |
| Zn1 – O6         | 1.996(10) | O4–Zn1–O7      | 98.0(4)  |
| Zn1 – O7         | 2.002(10) | O4–Zn1–O9      | 166.9(5) |
| Zn1 – O9         | 2.187(13) | O4–Zn1–N1      | 92.0(5)  |
| Zn1 – N1         | 1.999(12) | O6–Zn1–O7      | 109.5(4) |
| Zn2 – O4         | 2.047(11) | O6–Zn1–O9      | 90.0(5)  |
| Zn2 – O5         | 1.997(11) | O6–Zn1–N1      | 129.5(6) |
| Zn2 – O8         | 1.937(11) | O7–Zn1–O9      | 86.2(5)  |
| Zn2 – O10        | 2.227(11) | O7–Zn1–N1      | 117.0(6) |
| Zn2 – N2         | 2.023(15) | O9–Zn1–N1      | 75.1(5)  |
|                  |           | O4–Zn2–O5      | 98.9(5)  |
|                  |           | O4–Zn2–O8      | 97.3(5)  |
|                  |           | O4–Zn2–O10     | 167.6(5) |
|                  |           | O4–Zn2–N2      | 90.0(6)  |
|                  |           | O5–Zn2–O8      | 105.2(5) |
|                  |           | O5–Zn2–O10     | 88.7(4)  |
|                  |           | O5–Zn2–N2      | 134.9(5) |
|                  |           | O8–Zn2–O10     | 90.1(5)  |
|                  |           | O8–Zn2–N2      | 117.5(5) |
|                  |           | O10–Zn2–N2     | 77.6(5)  |

2. Photophysical Characterization.

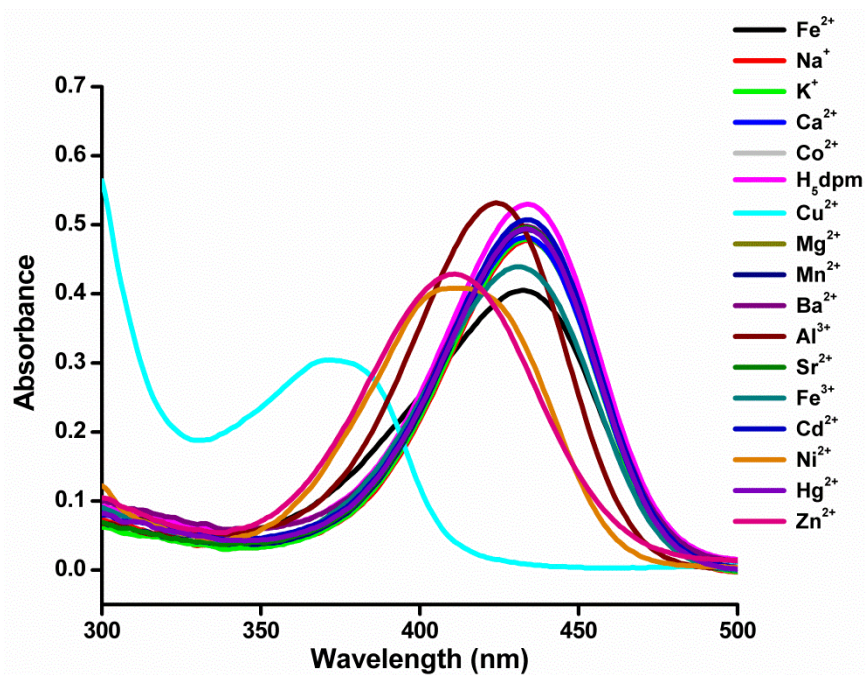

**Figure S6.** Absorbance spectra of **H<sub>5</sub>dpm** ( $5 \times 10^{-6}$  M) in Tris-buffer solution in the presence of 10 equivalent of  $\text{Cu}^{2+}$  and in the presence of 20 equivalent of other metals like  $\text{Na}^+$ ,  $\text{K}^+$ ,  $\text{Ca}^{2+}$ ,  $\text{Mg}^{2+}$ ,  $\text{Mn}^{2+}$ ,  $\text{Ba}^{2+}$ ,  $\text{Fe}^{2+}$ ,  $\text{Fe}^{3+}$ ,  $\text{Zn}^{2+}$ ,  $\text{Cd}^{2+}$ ,  $\text{Hg}^{2+}$ ,  $\text{Ni}^{2+}$ ,  $\text{Sr}^{2+}$ ,  $\text{Cu}^{2+}$ ,  $\text{Co}^{2+}$  and  $\text{Al}^{3+}$ .

2. Photophysical Characterization.

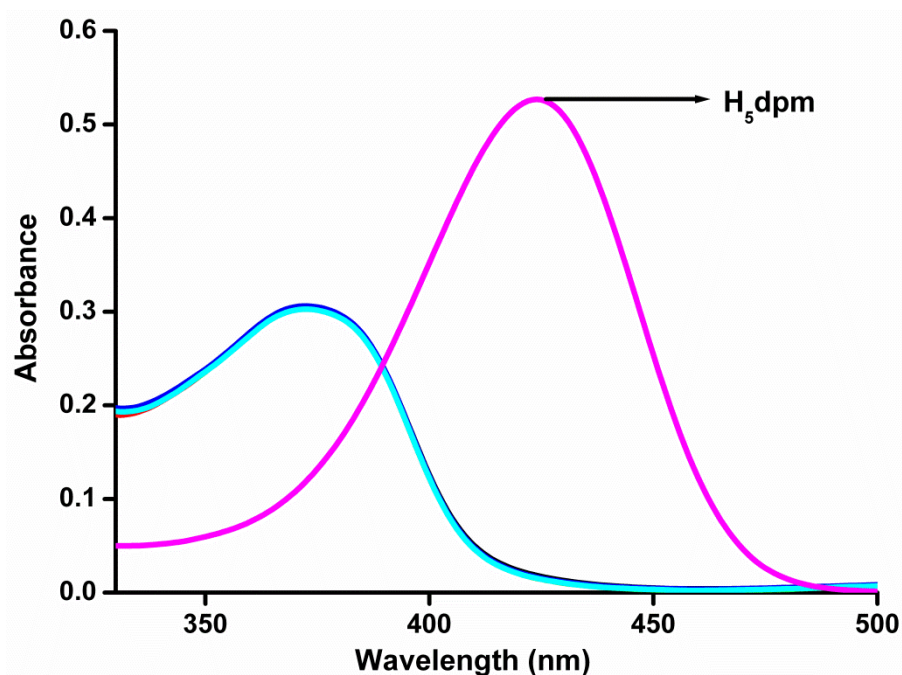

**Figure S7.** Anion independent absorbance behavior of **H<sub>5</sub>dpm** in presence of various Cu<sup>2+</sup> salts [e.g. Cu(ClO<sub>4</sub>)<sub>2</sub>, CuCl<sub>2</sub>, Cu(SO<sub>4</sub>)<sub>2</sub>, Cu(NO<sub>3</sub>)<sub>2</sub> and Cu(CH<sub>3</sub>COO)<sub>2</sub>].

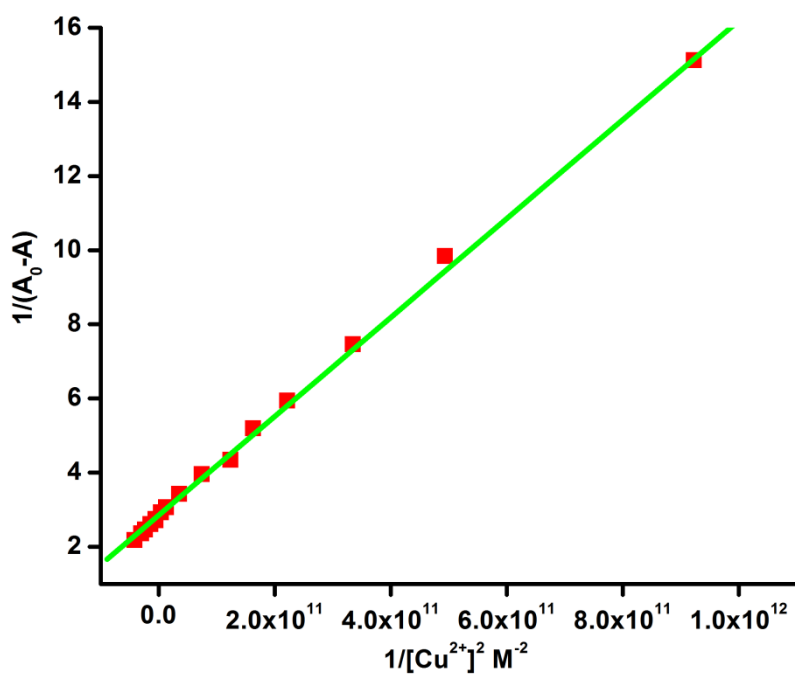

**Figure S8.** Benesi–Hildebrand plot  $1 / (A_0 - A)$  vs.  $1 / [Cu^{2+}]^2$  for complexation between **H<sub>5</sub>dpm** and Cu<sup>2+</sup> derived from absorbance titration curve at 434 nm.

2. Photophysical Characterization.

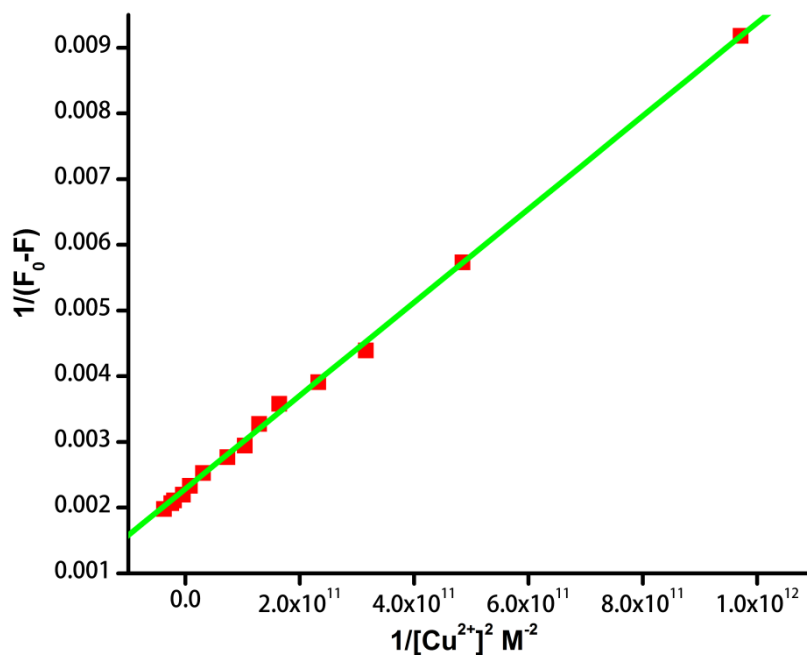

**Figure S9.** Benesi-Hildebrand plot  $1 / (F_0 - F)$  vs.  $1 / [Cu^{2+}]^2$  for complexation between **H<sub>5</sub>dpm** and  $Cu^{2+}$  derived from emission titration curve at 510 nm.

**Job's plot** for determination of stoichiometry of  $Cu^{2+} : H_5dpm$  complex in solution.

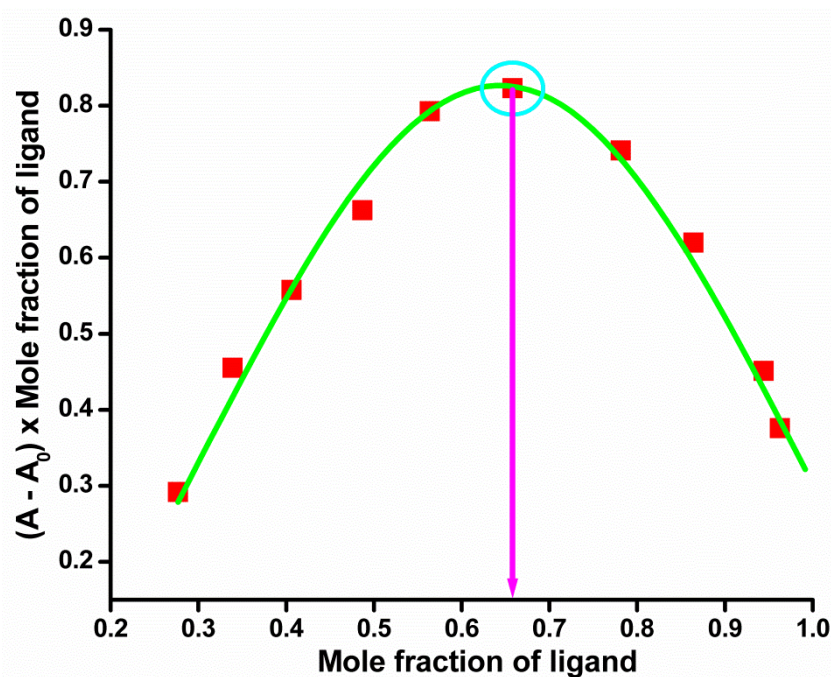

**Figure S10.** Job's plot for the identification of **H<sub>5</sub>dpm**- $Cu^{2+}$  complex stoichiometry using absorbance values.

## 2. Photophysical Characterization.

**Detection limit** calculation in emission spectroscopy.

The limit of detection (LOD) of **H<sub>5</sub>dpm**-Cu<sup>2+</sup> was measured on the basis of fluorescence titration measurement.

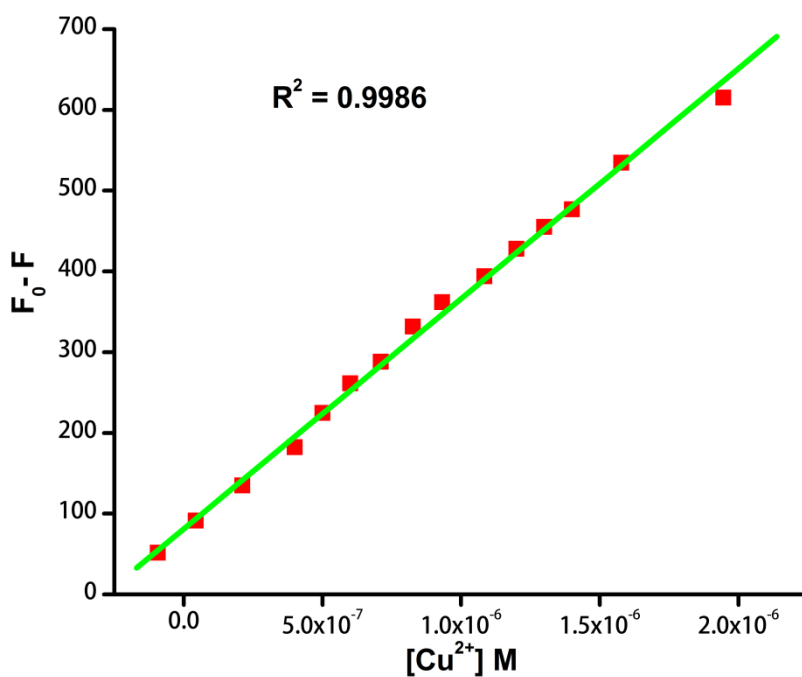

**Figure S11.** The limit of detection (LOD) of **H<sub>5</sub>dpm** for Cu<sup>2+</sup>: fluorescence responses ( $\lambda_{em} = 434$  nm) as a function of Cu<sup>2+</sup> concentration. The solid line represents a linear fit to the experimental data. The detection limit for Cu<sup>2+</sup> was determined to be  $11.2 \times 10^{-9}$  (M).



## 2. Photophysical Characterization.

### Reversibility studies in UV-vis spectroscopy.

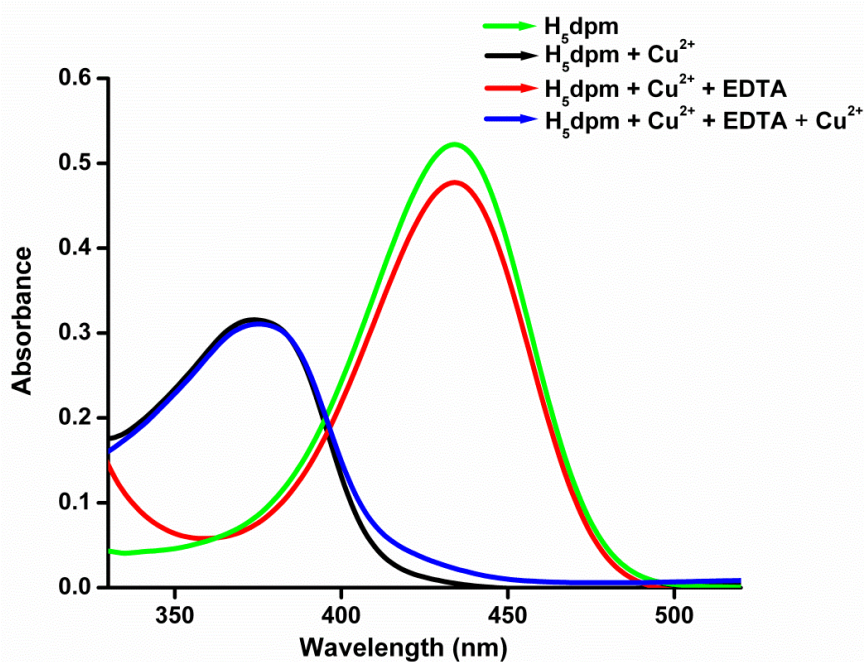

**Figure S12.** Absorption Spectra of  $H_5dpm$  in the presence of  $Cu^{2+}$  ion followed by addition of EDTA.

### Reversibility studies in emission spectroscopy.

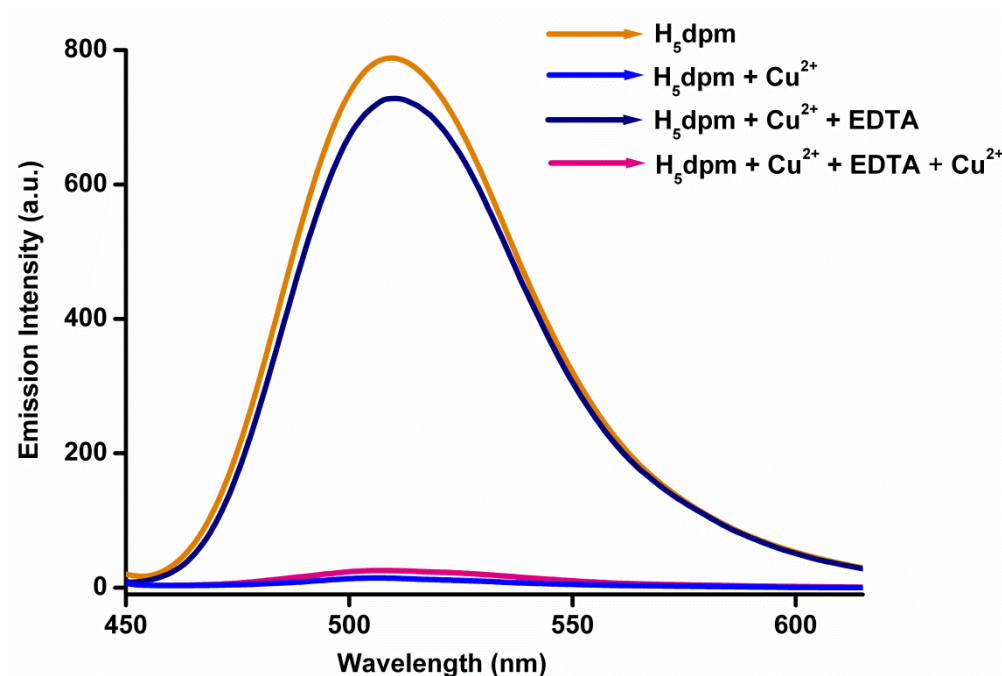

**Figure S13.** Fluorescence emission spectra of  $H_5dpm$  in the presence of  $Cu^{2+}$  ion followed by addition of EDTA.



2. Photophysical Characterization.

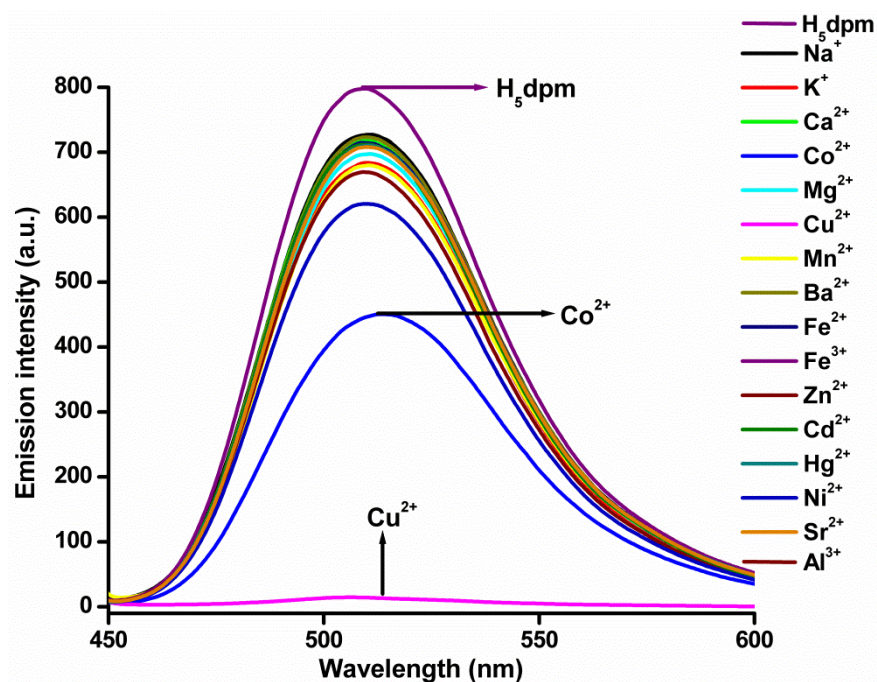

**Figure S14.** Fluorescence spectra of **H<sub>5</sub>dpm** ( $5 \times 10^{-6}$  M) in the presence of 50  $\mu\text{M}$  of  $\text{Cu}^{2+}$  and in the presence of other metals (100  $\mu\text{M}$ ) like  $\text{Na}^+$ ,  $\text{K}^+$ ,  $\text{Ca}^{2+}$ ,  $\text{Mg}^{2+}$ ,  $\text{Mn}^{2+}$ ,  $\text{Ba}^{2+}$ ,  $\text{Fe}^{2+}$ ,  $\text{Fe}^{3+}$ ,  $\text{Zn}^{2+}$ ,  $\text{Cd}^{2+}$ ,  $\text{Hg}^{2+}$ ,  $\text{Ni}^{2+}$ ,  $\text{Sr}^{2+}$ ,  $\text{Cu}^{2+}$ ,  $\text{Co}^{2+}$  and  $\text{Al}^{3+}$  ( $\lambda_{\text{ex}}=434$  nm,  $\lambda_{\text{em}}=510$  nm, slit: 5nm / 5nm).

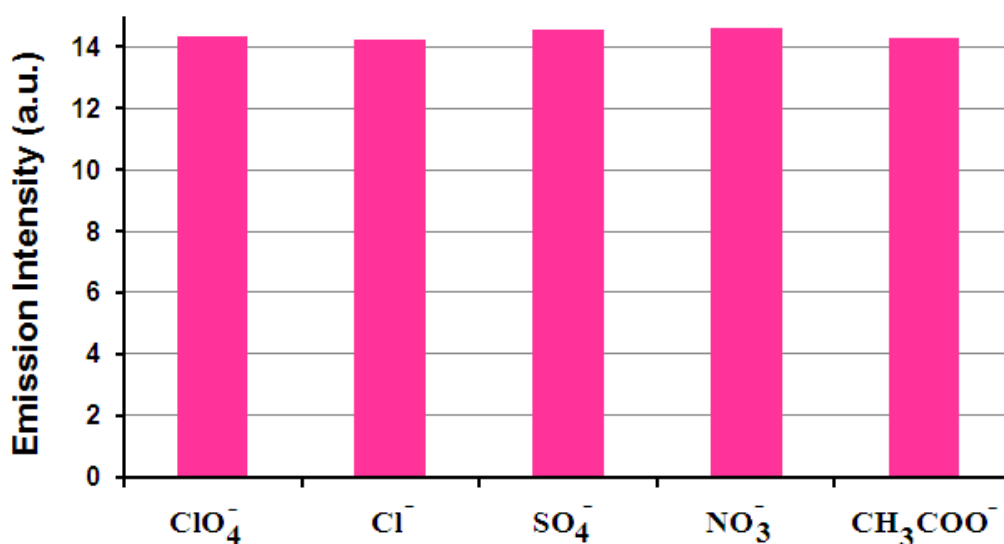

**Figure S15.** Anion independent Emission intensity of **H<sub>5</sub>dpm** in presence of various  $\text{Cu}^{2+}$  salts [e.g.  $\text{Cu}(\text{ClO}_4)_2$ ,  $\text{CuCl}_2$ ,  $\text{Cu}(\text{SO}_4)_2$ ,  $\text{Cu}(\text{NO}_3)_2$  and  $\text{Cu}(\text{CH}_3\text{COO})_2$ ].

## 2. Photophysical Characterization.

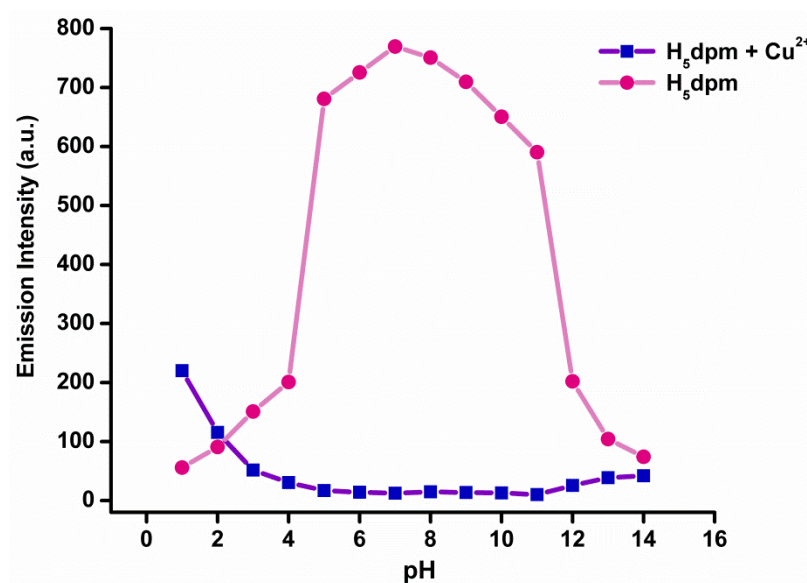

**Figure S16.** Emission intensity of probe **H<sub>5</sub>dpm** (5 μM) in absence and in presence of Cu<sup>2+</sup> at different pH values in aqueous solution.

### Linear solvation energy relationship

$$E_F (\text{cm}^{-1}) = E_0 + A\alpha + B\beta + C\pi^*$$

$$E_F (\text{cm}^{-1}) = 18974.99805 + 58.9784 \alpha + 118.96533 \beta + 910.48326 \pi^*$$

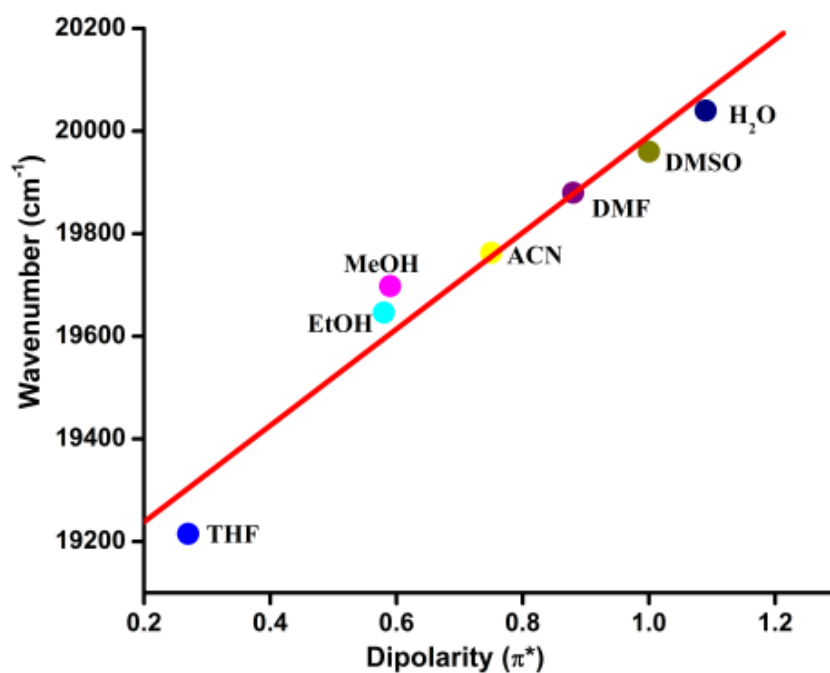

**Figure S17.** Linear solvation energy relationship plot of wavenumber (cm<sup>-1</sup>) vs. Dipolarity (π\*) for non-specific interaction.

2. Photophysical Characterization.

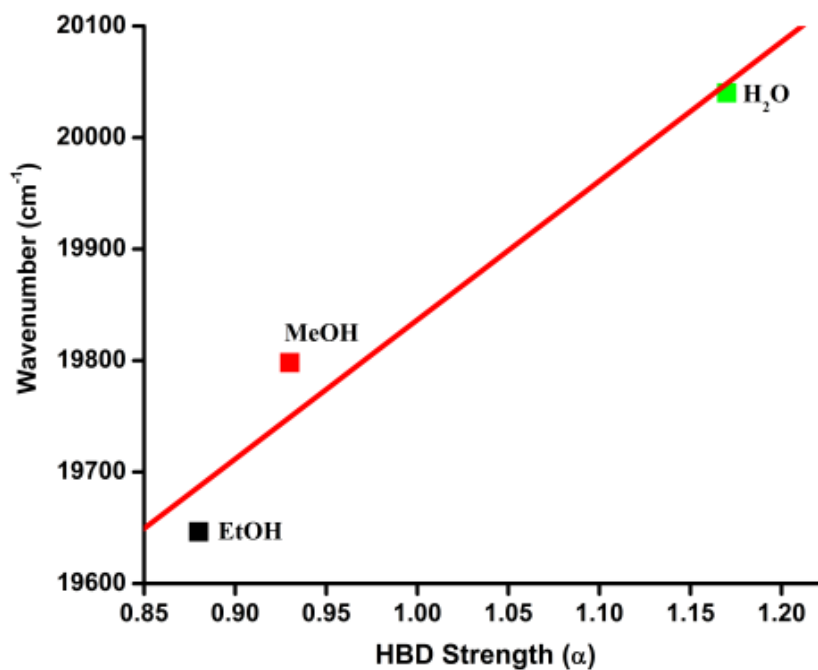

**Figure S18.** Linear solvation energy relationship plot of wavenumber (cm<sup>-1</sup>) vs. HBD Strength (α) for specific interaction.

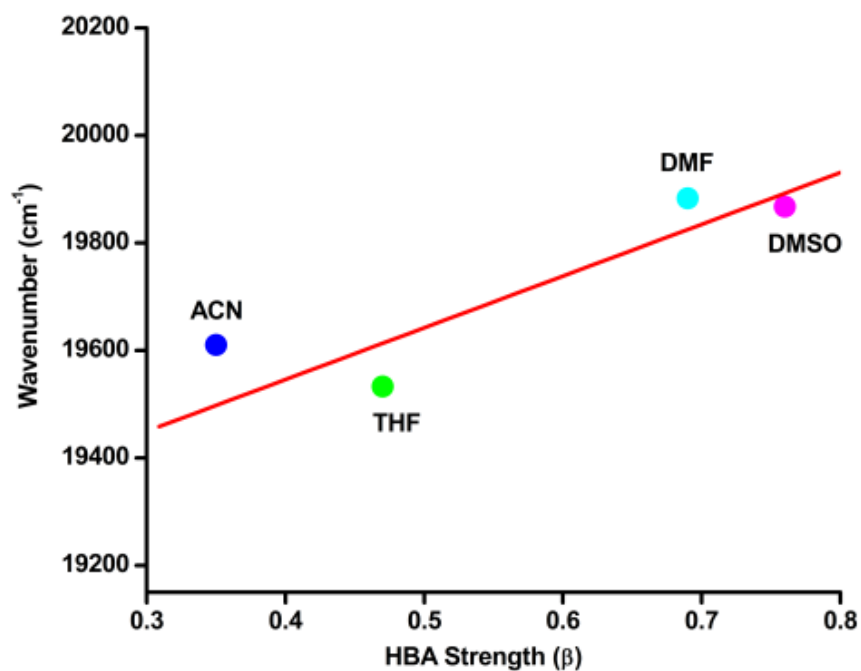

**Figure S19.** Linear solvation energy relationship plot of wavenumber (cm<sup>-1</sup>) vs. HBA Strength (β) for specific interaction.

### 3. Theoretical Data.

In **Figure S20** we show the optimized geometry of complex **2** with a water bridging molecule instead of a MeOH, including some geometric features. It can be observed that it is very similar to the one shown in the main manuscript (see **Fig. 7**)

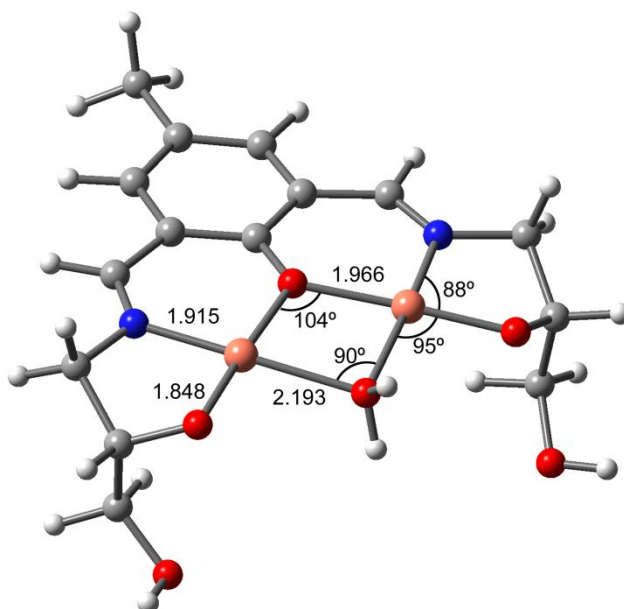

**Figure S20.** BP86-D3/def2-TZVP optimized structure of  $[\text{Cu}_2(\text{H}_2\text{dpm})\text{H}_2\text{O}]^+$  complex. Distances are in Å.

In **Figure S21** we show the single occupied molecular orbitals of  $[\text{Cu}_2(\text{H}_2\text{dpm})\text{H}_2\text{O}]^+$  complex. In the ground state ( $S_0$ ) of the complex the HOMO and HOMO - 1 are mainly composed by the  $\text{Cu}^{2+}$  magnetic orbitals ( $d_{x^2-y^2}$ ) and some contribution of the atoms of the ligand that are directly bonded to the metal centers (**Figure S21A, B**). In fact the spin density plot for the high spin configuration (ferromagnetic coupling) clearly indicates that the spin is located in the Cu metal centers and the atoms directly bonded to them (**Figure S21C**).

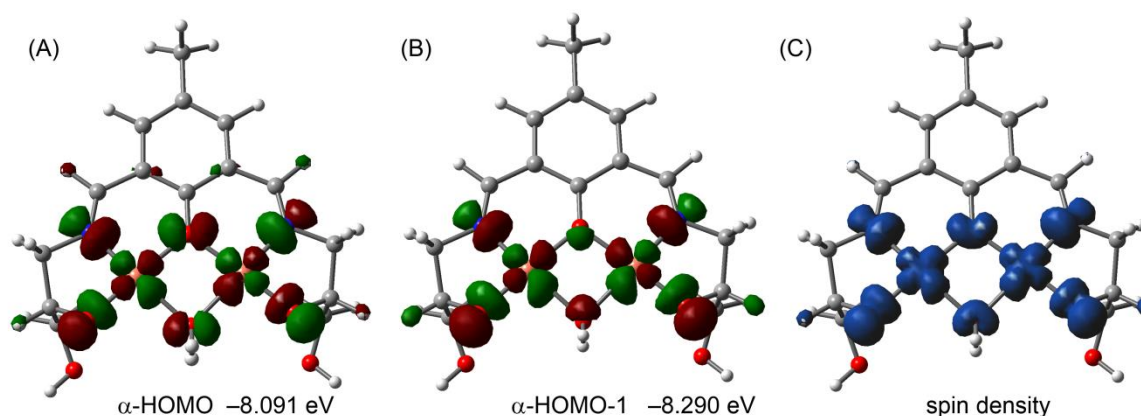

**Figure S21.** Molecular orbital and spin density plots obtained for complex **2** using  $\text{H}_2\text{O}$  instead of MeOH bridging ligand.

### 3. Theoretical Data.

**Table S3.** Selected parameters for the vertical excitation (UV-vis absorptions), electronic excitation energies (eV) and oscillator strengths ( $f$ ), configurations of the low-lying excited states of **H<sub>5</sub>dpm**.

| Process                                     | Electronic transitions | Composition                                                                       | Excitation energy  | Oscillator strength ( $f$ ) | Contribution       | $\lambda_{\text{exp}}$ (nm) |
|---------------------------------------------|------------------------|-----------------------------------------------------------------------------------|--------------------|-----------------------------|--------------------|-----------------------------|
| Absorption                                  | $S_0 \rightarrow S_1$  | HOMO $\rightarrow$ LUMO<br>HOMO-1 $\rightarrow$ LUMO                              | 2.5516 eV (486 nm) | 0.0028                      | 95 %<br>5 %        | -                           |
| Absorption                                  | $S_0 \rightarrow S_2$  | HOMO $\rightarrow$ LUMO<br>HOMO-1 $\rightarrow$ LUMO<br>HOMO-2 $\rightarrow$ LUMO | 2.7962 eV (443 nm) | 0.1841                      | 89 %<br>5 %<br>5 % | 430                         |
| H <sub>2</sub> O instead of MeOH as solvent |                        |                                                                                   |                    |                             |                    |                             |
| Process                                     | Electronic transitions | Composition                                                                       | Excitation energy  | Oscillator strength ( $f$ ) | Contribution       | $\lambda_{\text{exp}}$ (nm) |
| Absorption                                  | $S_0 \rightarrow S_1$  | HOMO $\rightarrow$ LUMO<br>HOMO-1 $\rightarrow$ LUMO                              | 2.5609 eV (484 nm) | 0.0029                      | 95 %<br>5 %        | -                           |
| Absorption                                  | $S_0 \rightarrow S_2$  | HOMO $\rightarrow$ LUMO<br>HOMO-1 $\rightarrow$ LUMO<br>HOMO-2 $\rightarrow$ LUMO | 2.8011 eV (446 nm) | 0.1867                      | 89 %<br>5 %<br>5 % | 430                         |

**Table S4.** Selected parameters for the vertical excitation (UV-vis absorptions) of complex **2**, electronic excitation energies (eV) and oscillator strengths ( $f$ ), configurations of the low-lying excited states of complex **2**; calculation of the  $S_0$ - $S_n$  energy gaps based on optimized ground-state geometries (UV-vis absorption) (MeOH or H<sub>2</sub>O used as solvent).

| Electronic transitions           | Composition                                                                                                  | Contribution       | Excitation energy     | Oscillator strength ( $f$ ) | $\lambda_{\text{exp}}$ (nm) |
|----------------------------------|--------------------------------------------------------------------------------------------------------------|--------------------|-----------------------|-----------------------------|-----------------------------|
| $S_0 \rightarrow S_{43}$         | HOMO-4 $\rightarrow$ LUMO (alpha)<br>HOMO-13 $\rightarrow$ LUMO (beta)<br>HOMO-2 $\rightarrow$ LUMO+2 (beta) | 39 %<br>12%<br>37% | 3.1992 eV<br>(387 nm) | 0.0576                      | 375                         |
| H <sub>2</sub> O instead of MeOH |                                                                                                              |                    |                       |                             |                             |
| Electronic transitions           | Composition                                                                                                  | Contribution       | Excitation energy     | Oscillator strength ( $f$ ) | $\lambda_{\text{exp}}$ (nm) |
| $S_0 \rightarrow S_{43}$         | HOMO-4 $\rightarrow$ LUMO (alpha)<br>HOMO-13 $\rightarrow$ LUMO (beta)<br>HOMO-2 $\rightarrow$ LUMO+2 (beta) | 39 %<br>12%<br>37% | 3.2023 eV<br>(387 nm) | 0.0580                      | 375                         |

4. Miscellaneous

**Chart 1.** Comparison of the present probe, **H<sub>5</sub>dpm** with some of the recently reported probes for Cu<sup>2+</sup> encountered in literature.

| Probes                                                                                                                                                                                                                                                                                                                                                                                         | Detection limit | Binding constant                                                                       | Stoichiometric ratio (ligand : Cu <sup>2+</sup> ) | Ref.         |
|------------------------------------------------------------------------------------------------------------------------------------------------------------------------------------------------------------------------------------------------------------------------------------------------------------------------------------------------------------------------------------------------|-----------------|----------------------------------------------------------------------------------------|---------------------------------------------------|--------------|
| 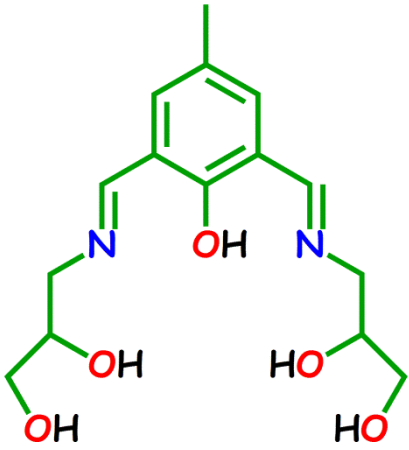 <p>The structure shows a central benzene ring with a methyl group at the top and a hydroxyl group at the bottom. Two imine groups (-CH=N-) are attached to the ring at the 2 and 6 positions. Each imine group is connected to a 1,2,3-trihydroxypropyl chain. The entire molecule is drawn in green.</p>    | 14.3 nM         | $2.90 \times 10^5 \text{ (M}^{-1}\text{)}$                                             | 1 : 2                                             | In this work |
|  <p>The structure shows a central benzene ring with a methyl group at the top and a hydroxyl group at the bottom. Two imine groups (-CH=N-) are attached to the ring at the 2 and 6 positions. Each imine group is connected to a 1,2,3-trihydroxyisopropyl chain. The entire molecule is drawn in red.</p> | 20 ppm          | $1.0 \times 10^2 \text{ (M}^{-2}\text{)}$<br>$4.0 \times 10^4 \text{ (M}^{-2}\text{)}$ | 2 : 1<br>1 : 2                                    | [58]         |

|                                                                                   |          |                                            |       |      |
|-----------------------------------------------------------------------------------|----------|--------------------------------------------|-------|------|
| 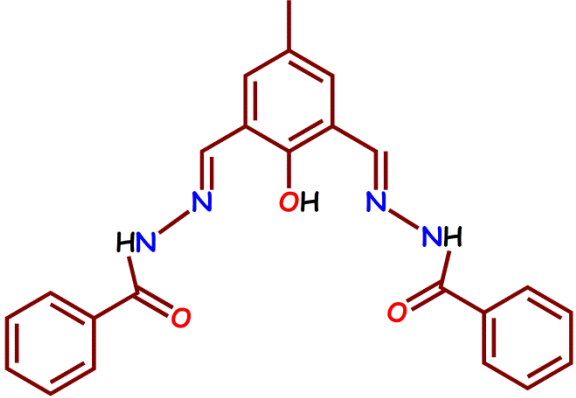 | 0.272 nM | $1.87 \times 10^6 \text{ (M}^{-1}\text{)}$ | 1 : 2 | [69] |
|-----------------------------------------------------------------------------------|----------|--------------------------------------------|-------|------|

### References

1. G. M. Sheldrick, SHELXL-97, Crystal Structure Refinement Program, University of Göttingen, 1997.
2. G. M. Sheldrick, SADABS, a software for empirical absorption correction, Ver. 2.05; University of Göttingen: Göttingen, Germany, 2002.
3. K. Brandenburg, Diamond, ver. 3.0; Crystal Impact GbR: Bonn (Germany), 2005.
